# Supplementary material for: Effect of Vibrio-Derived Extracellular Protease vEP-45 on the Blood Complement System
Source: MDPI journal article supplement (doi:10.3390/biology10080798), 2021-08-18
Supplement: s1 [file s1]

# Figure S1

A

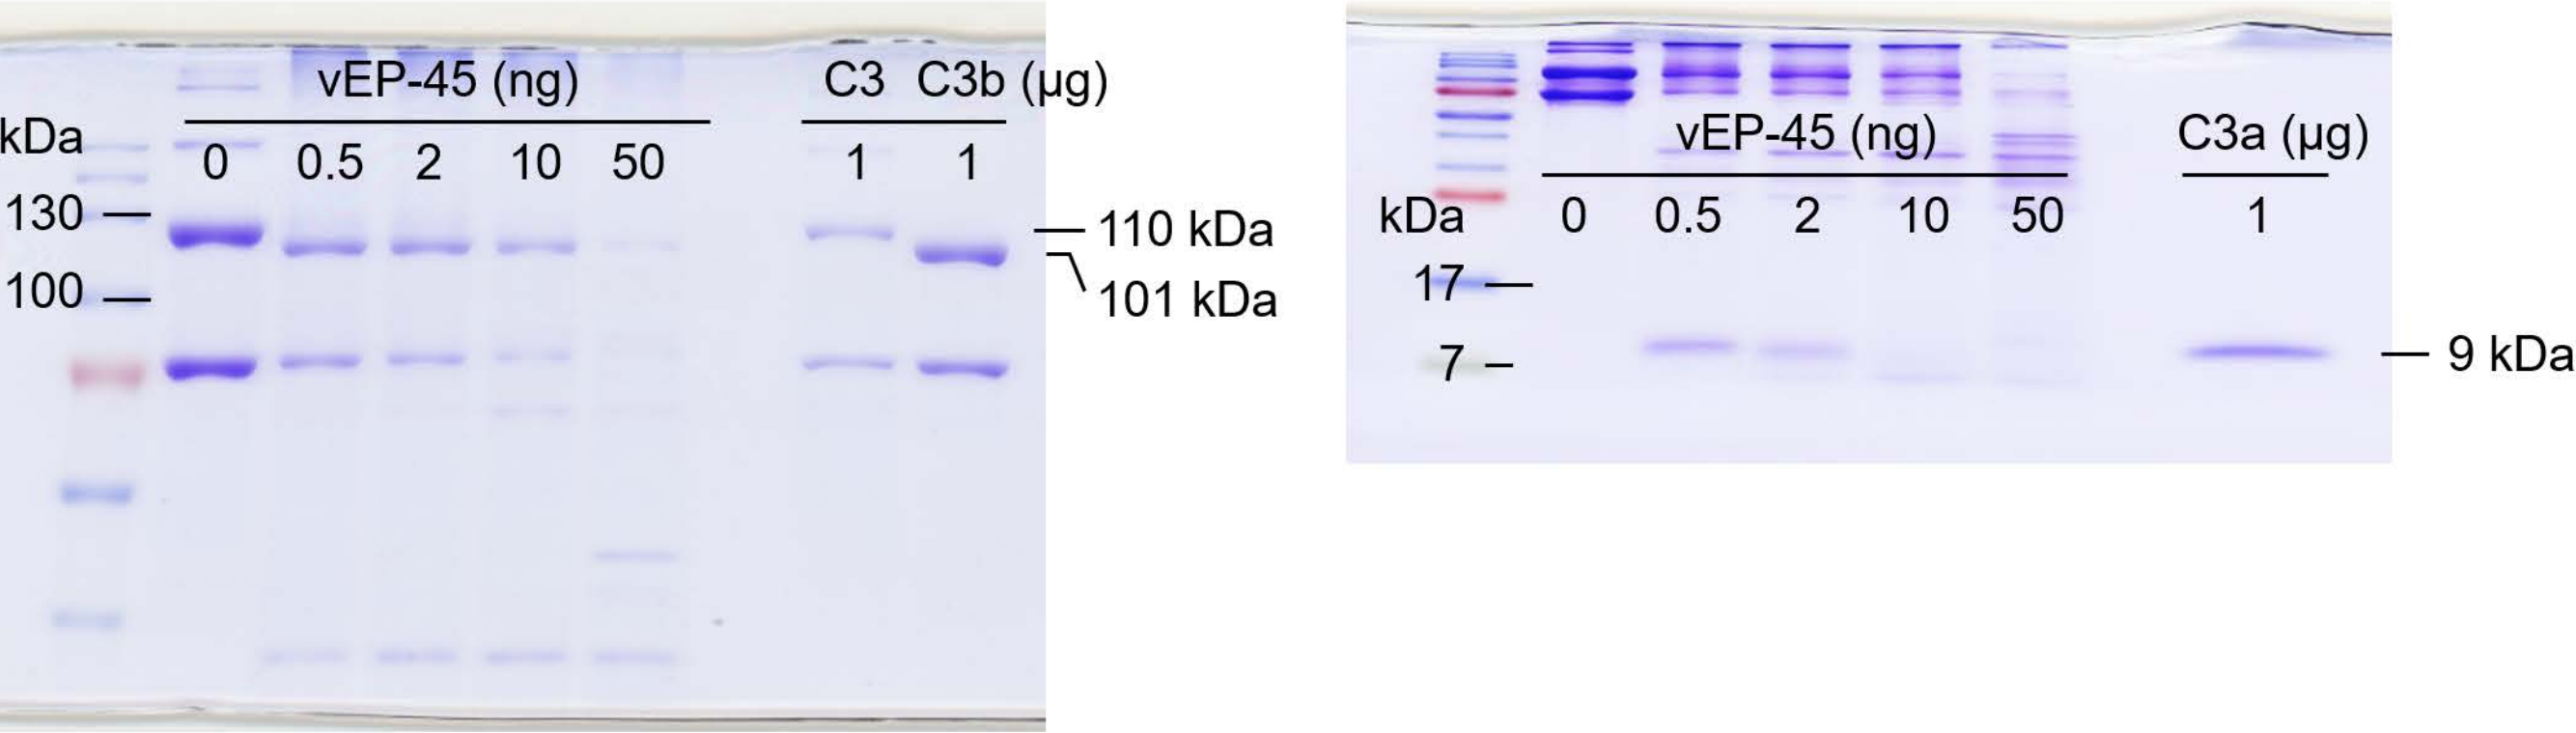

B

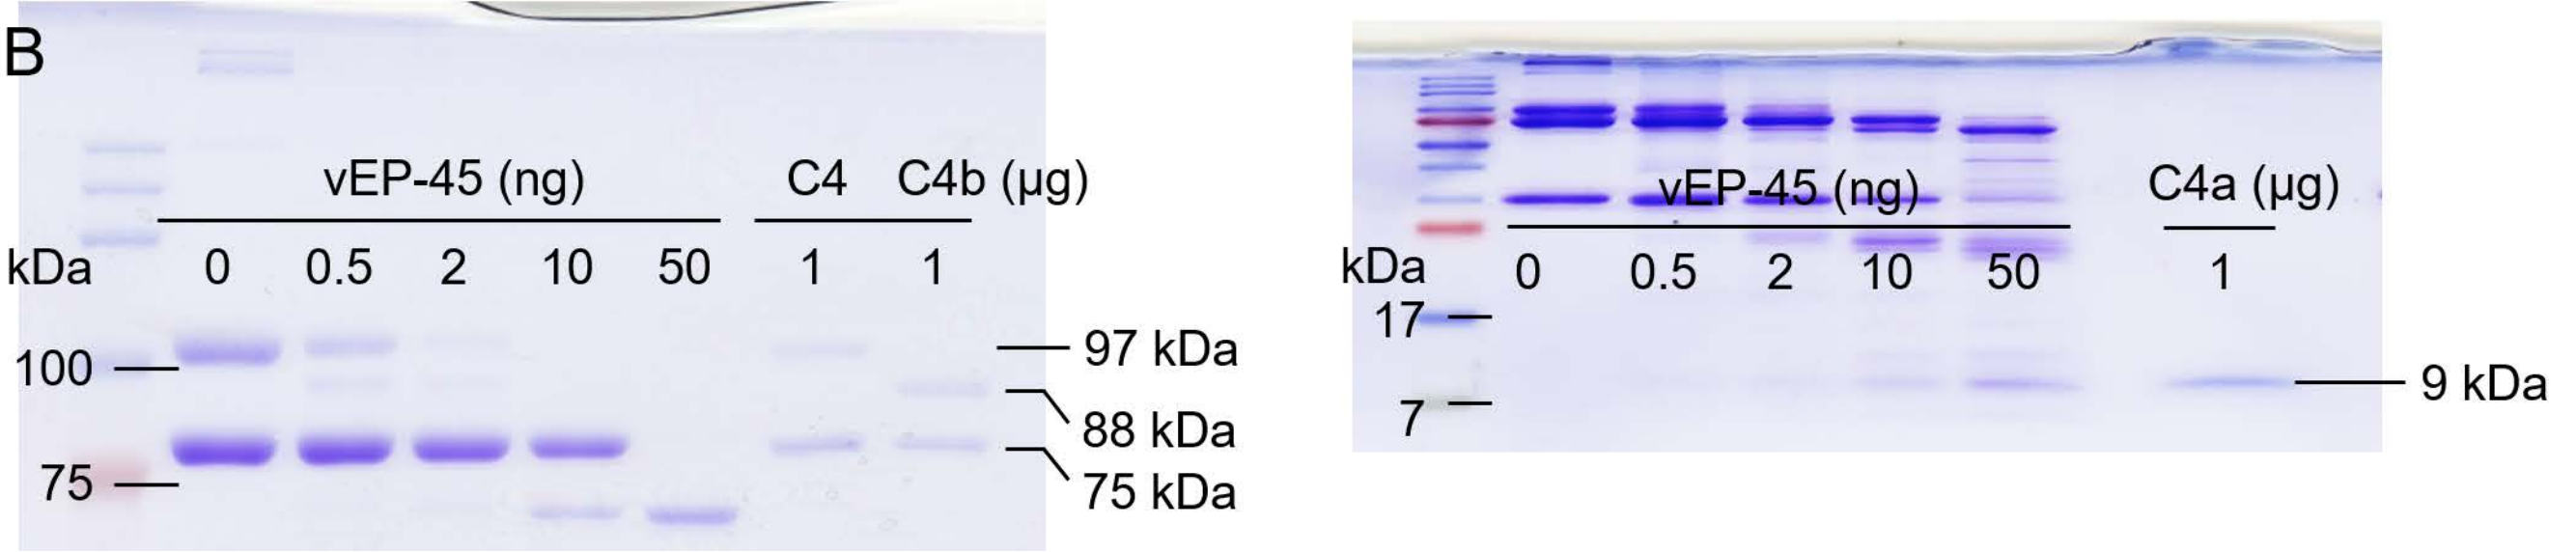

C

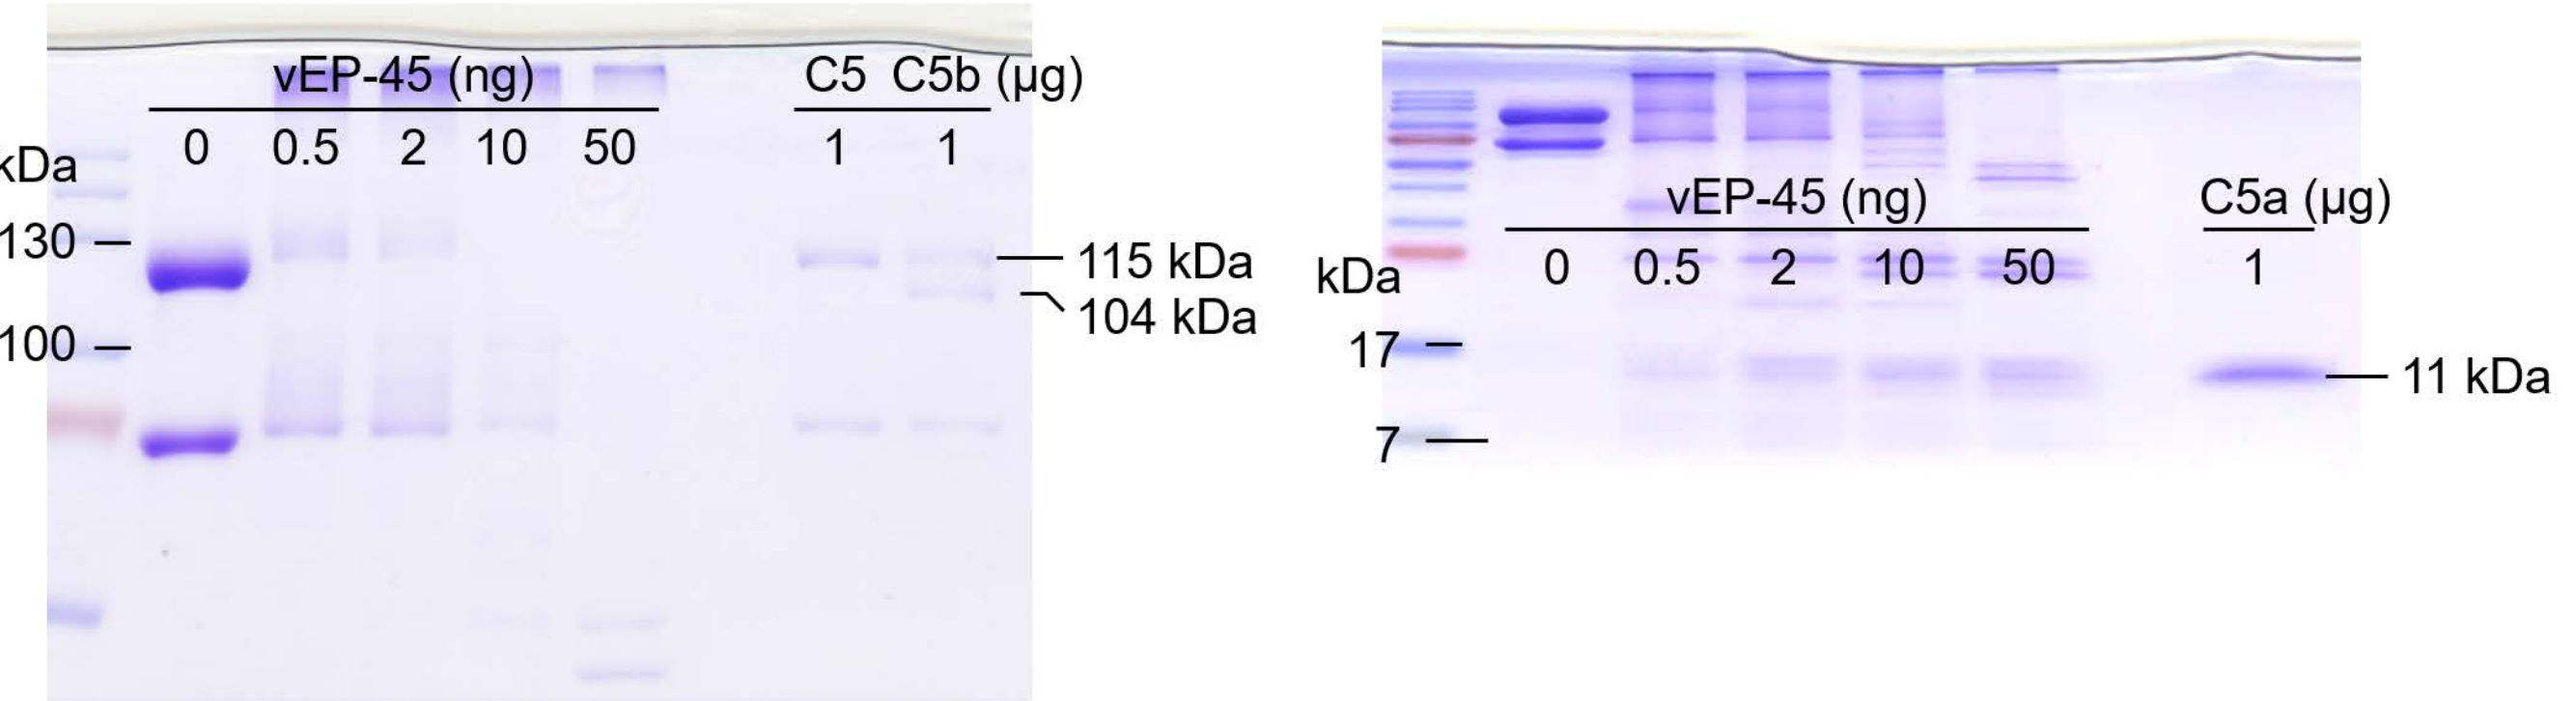

**Figure S1.** Cleavage of human complement proteins (C3, C4, and C5) by vEP-45 as determined by SDS-PAGE.

# Figure S2

A

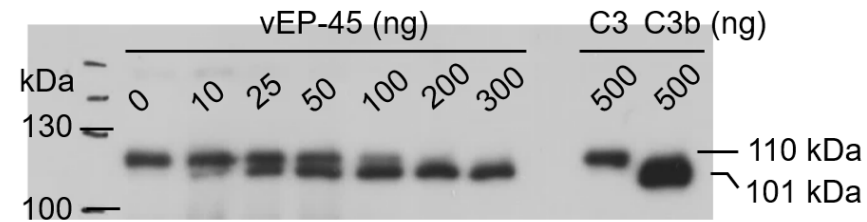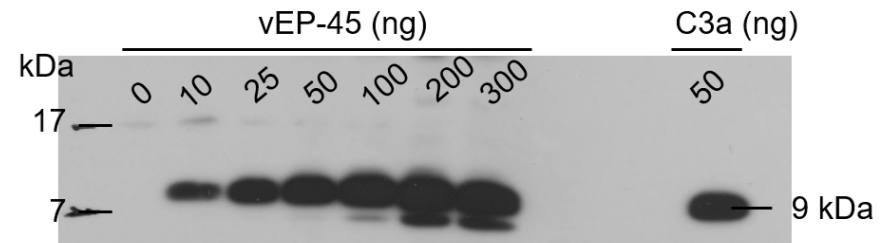

B

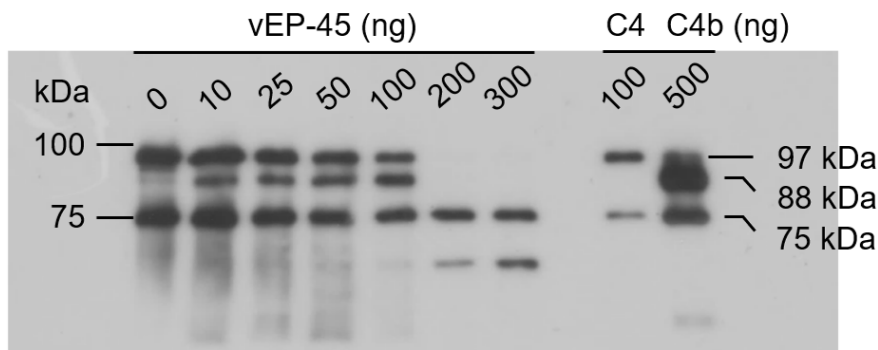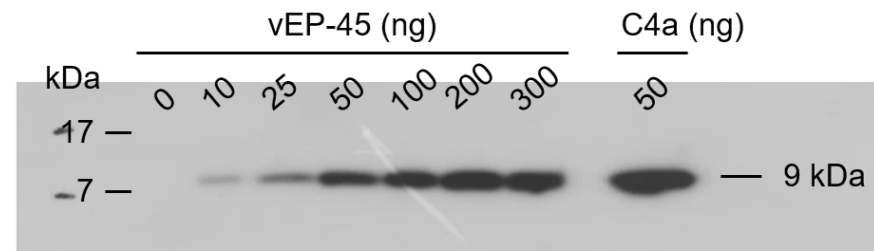

C

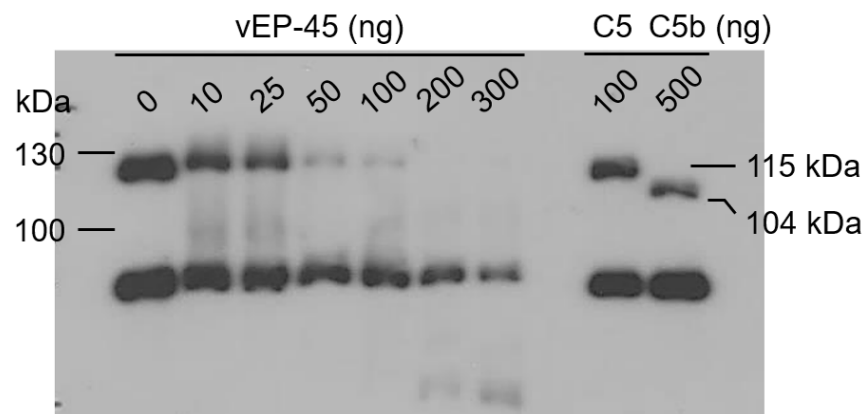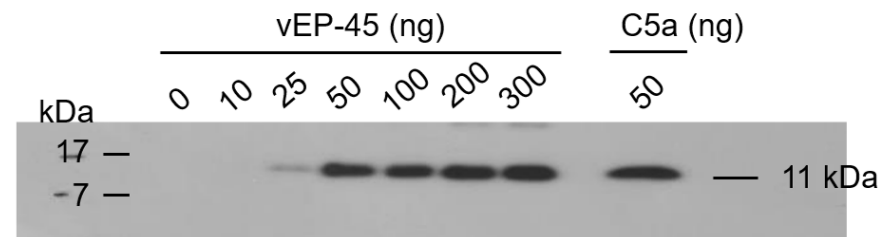

**Figure S2.** Cleavage of human complement proteins by vEP-45 as detected with Western blotting.

# Figure S3

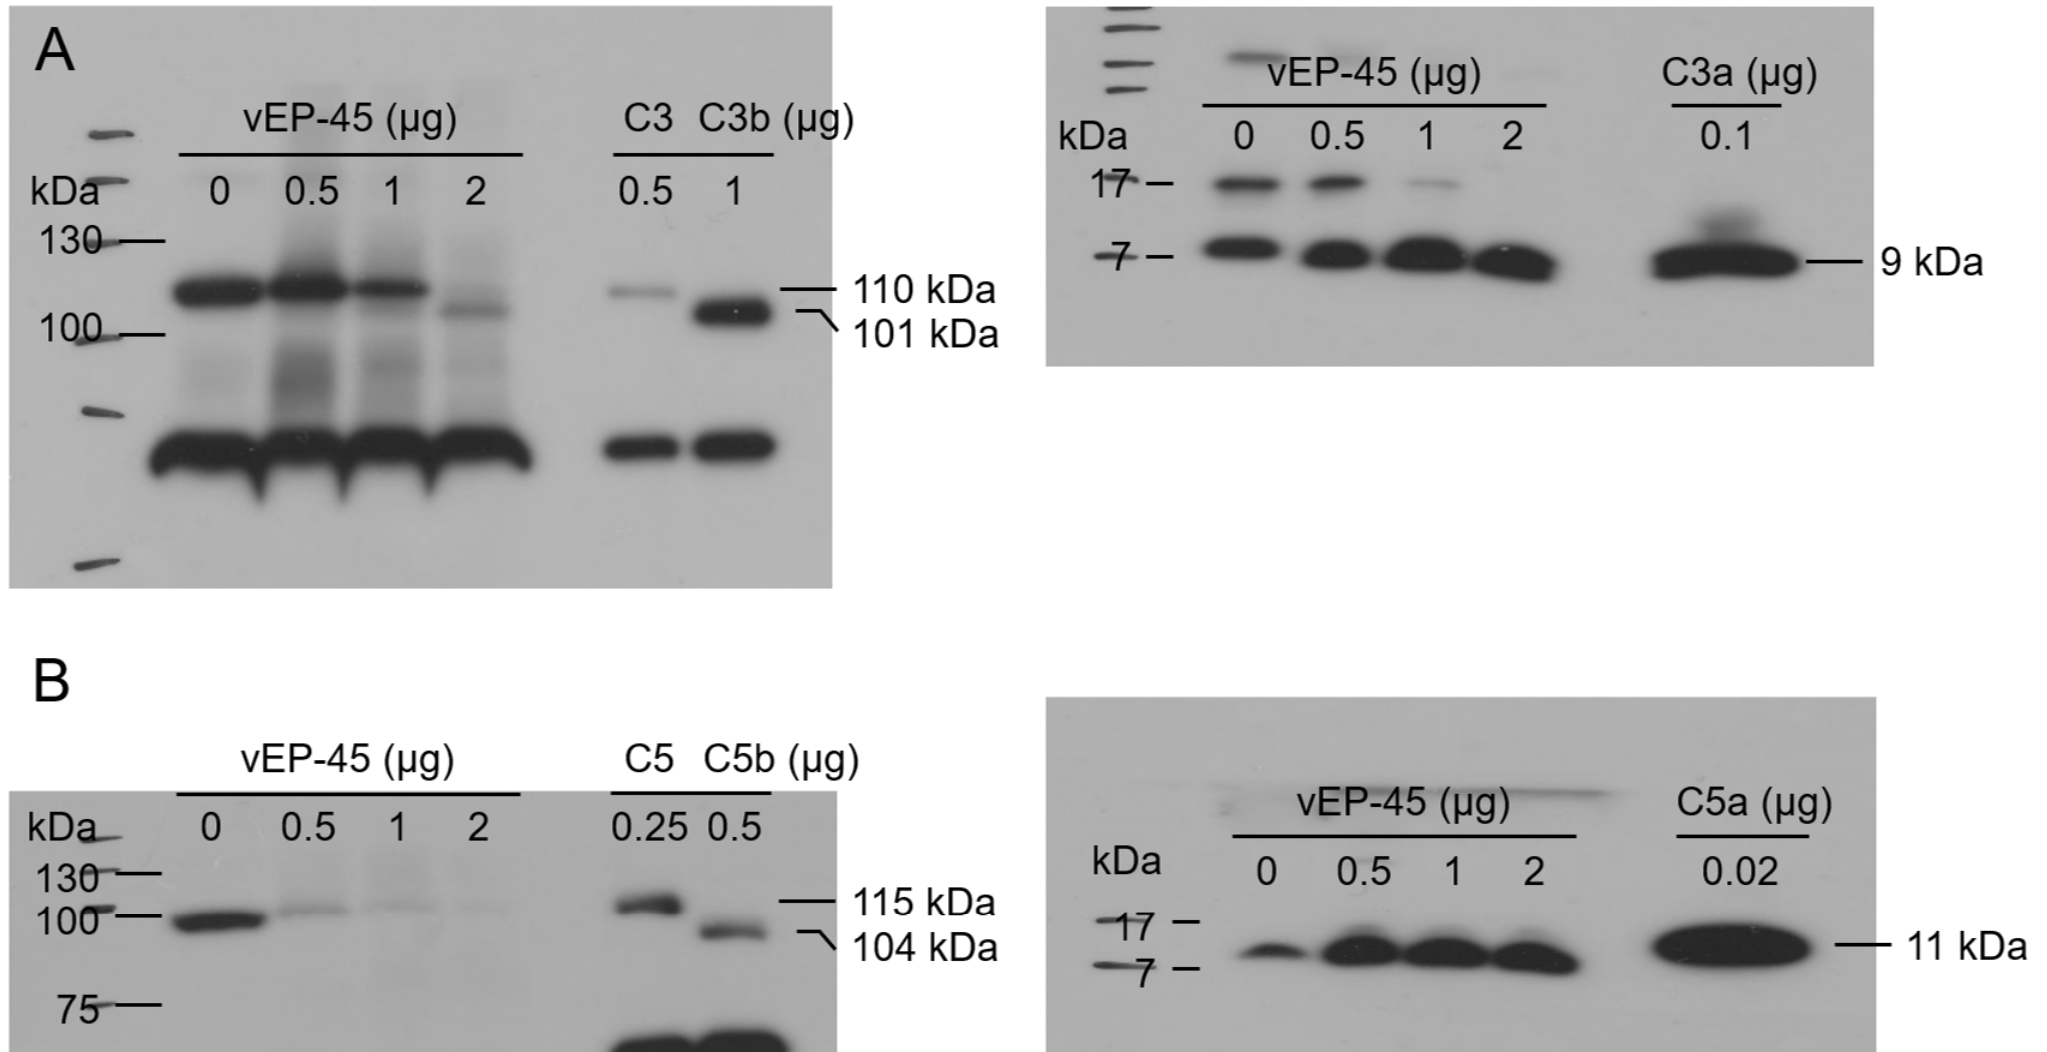

**Figure S3.** Cleavage of C3 and C5 by vEP-45 in human plasma.

# Figure S4

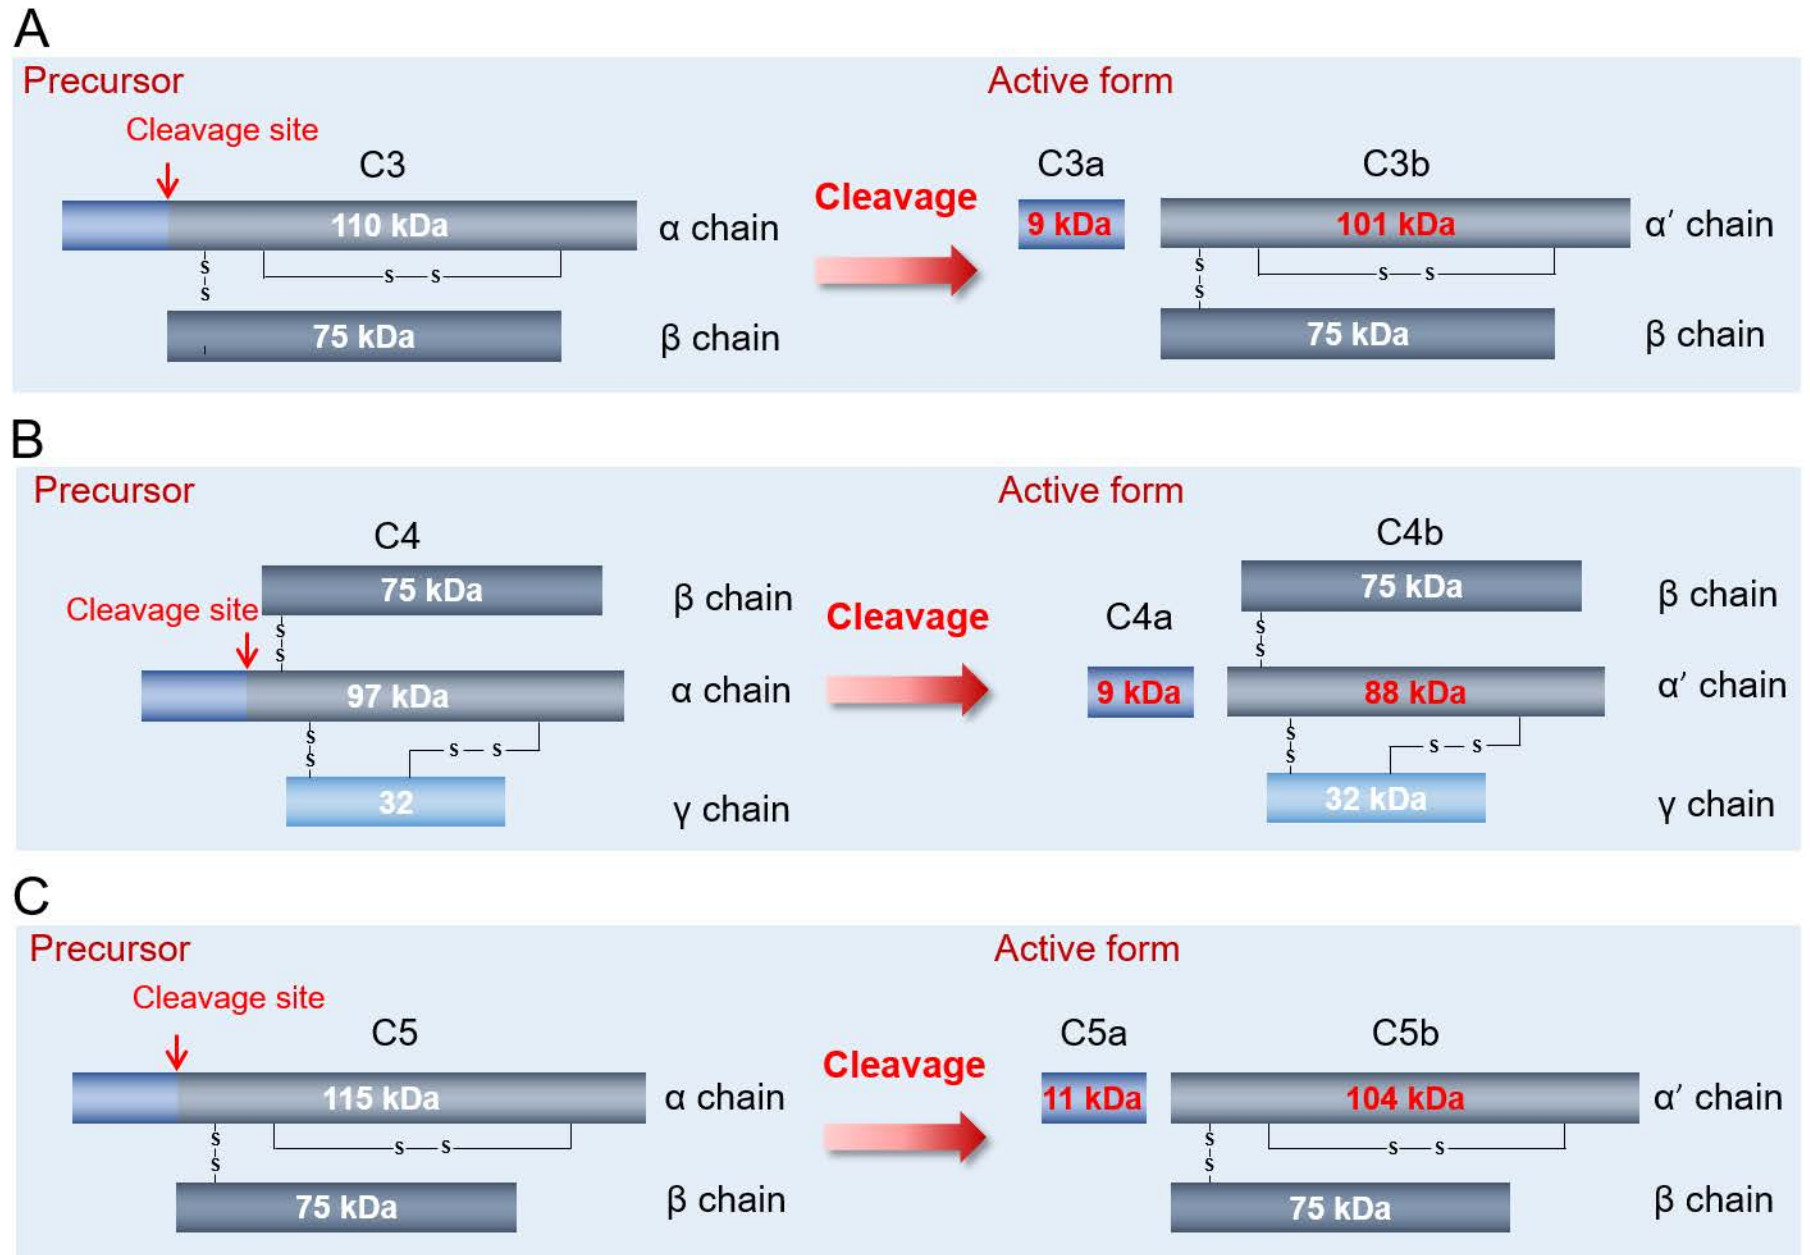

**Figure S4.** Schematic structure of C3 (A), C4 (B), and C5 (C).
